# Supplementary material for: Signals of forest degradation in the demography of common Asian amphibians
Source: PeerJ. 2018 Jan 31;6:e4220. doi: 10.7717/peerj.4220 (PMC5797445; doi:10.7717/peerj.4220)
Supplement: Data S1 — Raw data from Hong Kong on body condition of Duttaphrynus melanostictus, larval growth and survival of Microhyla fissipes, and embryonic survival of Polypedates melanostictus. [file peerj-06-4220-s001.xlsx]

## Sheet: Sheet1
S1 Dataset. Amphibian Data from Hong Kong.
Duttaphrynus melanostictus body condition
Habitat	Sex	Length (mm)	Mass (g)		Habitat
a	f	66	32		a = agricultural land
a	u	37	4.5		d = degraded forest
a	u	27	2.6		i = intact forest
a	u	48	13
a	u	40	6.5
a	u	50	13.5
a	u	39	5.7
a	u	24	1.2
a	u	34	4.1
a	u	45	11
a	u	37	3.2
a	u	31	5.1
a	u	39	4.4
a	u	21	2
a	u	25	1.4
a	u	33	2.7
a	u	30	3.3
a	u	32	3.7
a	u	48	11
a	u	32	3
a	u	30	3.6
a	u	30	3
a	u	29	2
a	u	32	2.5
a	u	27	1.9
a	u	21	1.4
a	m	46	11.5
a	u	32	3.3
a	u	39	6.6
a	u	43	11
a	f	100	114
a	u	42	5.4
a	u	43	10
a	f	79	64
a	u	36	4.5
a	u	35	3.2
a	u	30	2.8
a	u	39	6
a	u	31	2.7
a	u	27	1.8
a	f	59	21
a	f	85	83
a	u	30	2.5
a	u	29	2.3
a	u	34	3.7
a	u	33	3
a	u	31	3.2
a	u	33	3.8
a	u	31	3.1
a	u	43	7.3
a	u	39	6.6
a	f	87	82
a	u	32	4.2
a	u	30	2.5
a	u	42	7.4
a	u	28	1.8
a	u	33	2.4
a	u	36	5.2
a	u	36	3.3
a	m	60	23
a	f	82	89
a	f	87	97.5
a	f	83	83
a	m	57	24
a	u	30	3.8
a	f	72	46
a	f	79	92
a	f	72	46
a	m	68	49
a	f	72	45
a	f	85	77
a	u	33	3.9
a	u	22	1.4
a	u	26	2.4
a	u	25	1.4
a	u	33	4
a	u	33	3.8
a	f	48	12.5
a	f	53	17
a	u	31	3.3
a	f	60	19
a	u	40	7.5
a	u	45	7
a	u	44	9
a	u	35	5.2
a	u	33	3.5
a	m	44	8.7
a	u	44	9.5
a	u	22	1
a	u	44	12
a	u	37	5.7
a	f	83	86
a	m	43	10
a	m	54	17
a	u	34	3.8
a	f	52	14.5
a	m	54	21.5
a	m	49	15
a	u	28	2.3
a	u	43	8.1
a	f	52	17
a	f	85	91
a	u	47	10
a	m	50	18.5
a	u	33	4.9
a	m	46	12.5
a	m	52	16.5
a	u	53	16.5
a	f	49	17
a	u	42	8
a	u	26	2
a	f	49	13
a	u	39	6
a	u	34	5.8
a	f	79	91
a	u	41	6.1
a	u	46	6.5
a	m	55	19
a	f	52	16.5
a	m	52	16.5
a	u	43	7.7
a	u	46	11.5
a	m	59	20
a	m	54	14
a	m	56	19
a	u	39	5.3
a	f	58	21
a	u	42	6.2
a	m	50	13
a	u	43	8.4
a	m	48	12
a	u	35	5
a	u	35	4
a	m	46	9
a	u	39	8
a	u	44	7.7
a	u	34	4.7
a	f	80	66
a	f	48	14
a	m	57	19
a	u	35	4.8
a	m	54	20
a	m	57	24.5
a	f	61	25
a	m	56	19
a	m	50	14
a	m	52	15
a	m	51	15
a	m	61	29
a	u	46	10
a	u	42	8.4
a	m	44	11
a	m	54	17
a	m	51	15.5
a	m	50	14.5
a	m	54	17
d	f	86	87
d	f	96	104
d	f	86	109
d	f	94	81
d	f	92	103
d	f	94	101
d	f	90	97.5
d	f	103	131
d	f	82	77
d	f	101	132
d	f	87	86
d	f	94	118
d	f	96	120
d	m	74	59
d	f	93	101
d	f	100	118
d	m	73	40
d	f	89	85
d	f	85	75
d	m	69	43
d	m	74	43
d	f	97	116
d	m	73	49
d	f	85	85
d	f	96	101.5
d	m	69	43
d	f	90	101
d	m	77	43
d	f	82	79
d	m	67	41
d	f	89	75
d	f	92	85
d	f	87	95
d	f	87	98
d	f	102	115.5
d	f	92	86
d	f	96	131
d	f	89	83
d	f	75	54
d	f	88	85
d	f	77	64
d	f	96	101
d	f	78	65
d	f	86	82
d	f	78	74
d	m	71	45
d	f	90	127
d	f	78	61.5
d	f	71	58
d	f	94	124
d	f	97	144
d	f	93	122.5
d	f	73	65
d	m	67	42
d	f	85	96.5
d	f	85	94
d	f	84	98
d	f	96	146
d	f	73	74
d	m	71	50
d	m	68	46.5
d	f	89	117
d	f	97	127.5
d	f	94	130
d	f	90	100.5
d	f	85	102
d	f	90	104
d	f	84	102
d	f	88	117
d	f	86	97
d	f	103	146
d	u	40	8.9
d	f	53	13
d	f	50	13
d	f	41	8.7
d	f	47	15
d	f	45	11
d	m	46	14.5
d	u	32	6.3
d	f	44	10
d	f	43	10
d	u	38	6.5
d	f	57	17
d	f	49	10
d	f	47	14
d	u	41	8.4
d	u	39	6.5
d	f	45	12
d	u	34	5.1
d	f	43	10
d	f	76	60
d	m	42	9.5
d	m	47	12
d	f	44	8.1
d	f	47	12
d	f	45	10
d	m	48	12.5
d	f	43	8
d	m	46	6.8
d	f	48	10
d	f	48	9
d	f	84	58
d	u	43	7.8
d	f	90	124
d	m	46	13.5
d	f	41	8.6
d	u	43	9
d	m	47	13
d	u	37	5.8
d	m	44	9.5
d	f	50	17
d	f	44	11
d	f	55	25.5
d	f	44	9.5
d	u	31	6.4
d	u	35	5.5
d	u	45	9.3
d	f	50	17
d	f	63	30
d	f	52	17
d	m	47	14.5
d	m	51	18.5
d	m	51	18
d	m	49	17
d	f	54	21
d	f	51	17.5
d	f	56	20
d	f	53	18.5
d	f	41	13
d	f	41	12
d	f	46	8
d	m	50	13.5
d	f	48	10
d	m	50	13.5
d	f	54	18.5
d	f	47	15.5
d	u	41	8
d	m	43	9
d	f	44	8.5
d	m	53	20
d	u	46	11
d	m	52	17.5
d	f	51	17
d	m	56	26.5
d	f	56	21
d	m	58	24.5
d	f	90	108
d	f	61	28
d	m	58	26
d	f	56	23
d	u	45	9.5
d	f	50	15
d	m	54	24
d	m	54	26
d	f	53	18.5
d	f	55	23.5
d	m	55	22
d	m	57	23.5
d	f	84	88.5
d	f	86	96
d	f	54	21
d	f	59	22.5
d	m	57	20.5
d	m	58	26
d	m	57	23
d	f	53	18
d	m	62	36
d	m	57	25
d	m	55	19
d	f	54	14.5
d	m	49	13
d	m	55	22
d	f	60	26.5
d	f	60	25
d	m	54	18
d	f	52	17
d	m	57	25
d	f	49	15.5
i	f	82	80
i	m	65	20
i	m	59	24.5
i	f	84	62
i	f	64	30
i	f	61	33.5
i	f	90	87
i	f	80	63
i	u	60	21
i	f	81	58
i	f	93	101.5
i	f	87	81
i	f	93	100
i	f	90	75
i	f	75	50
i	m	78	46
i	f	80	65
i	u	54	15
i	f	85	66
i	u	58	21
i	u	60	30
i	f	82	56
i	f	93	95
i	m	74	38
i	m	65	34
i	m	75	56
i	m	85	52
i	f	65	32.5
i	f	66	29.5
i	f	85	62
i	f	87	88
i	m	73	40
i	m	75	51
i	m	85	59
i	m	65	27.5
i	f	90	85.5
i	m	77	55.5
i	m	77	33
i	m	56	16.5
i	f	65	29
i	f	77	55
i	f	75	54
i	f	80	50
i	m	69	44
i	f	87	75
i	f	85	102.5
i	f	93	89
i	f	61	52
i	f	96	107
i	f	95	87
i	m	64	30.5
i	f	99	107
i	f	103	114.2
i	m	71	45
i	u	37	3.6
i	m	66	39.5
i	u	40	6
i	f	76	66
i	u	38	5.3
i	f	95	117
i	u	38	4.9
i	f	77	57
i	u	40	6.3
i	u	29	2.3
i	u	36	4.6
i	f	93	121.5
i	f	88	115
i	u	40	7.4
i	f	75	41
i	f	49	19
i	m	44	8.4
i	f	88	89
i	f	95	109
i	f	84	103
i	f	85	101
i	u	42	8.3
i	u	41	12
i	m	52	18.5
i	f	50	16
i	u	48	12
i	u	37	6.5
i	f	56	19
i	f	51	15
i	f	56	19
i	f	86	109
i	f	50	13.5
i	u	36	5.3
i	f	57	20
i	f	85	93
i	u	46	12
i	u	40	6.7
i	f	57	24
i	f	49	13
i	u	46	13
i	u	43	8.7
i	u	46	11
i	m	50	11.5
i	m	63	34
i	f	51	17
i	f	52	15
i	m	57	23.5
i	f	56	23
i	m	51	10
i	u	40	7
i	f	79	83
i	m	60	29
i	f	52	26
i	f	60	26
i	m	56	22.5
i	f	55	21
i	f	96	153.5
i	f	59	22
i	u	34	4.2
i	f	66	35
i	m	58	25
i	f	79	53
i	m	44	10
i	m	46	11
i	m	53	21
i	u	44	10
i	u	39	6.1
i	f	55	20
i	m	59	31
i	f	62	25
i	u	41	6.9
i	f	82	81
i	m	56	20
i	f	58	23
i	m	49	14
i	u	28	3
i	f	52	18
i	u	34	4
i	f	53	16.5
i	f	50	13
i	u	31	2.4
i	f	75	58
i	f	81	72
i	u	28	2.4
i	f	57	21
i	m	54	17
i	m	61	27
i	f	89	162.5
i	m	60	24
i	m	55	20
i	m	56	24.5
i	m	58	26
i	m	54	21.5
i	m	57	23.5
i	m	56	24
i	m	57	27
i	m	55	24
i	m	54	17.5
i	f	54	17
i	u	47	13.5
i	m	49	14
i	m	58	25.5
i	m	45	12.5
i	m	61	30
i	m	58	26
i	u	44	8.5
i	m	59	25.5
i	m	57	26
i	f	69	39.5
i	m	62	27
i	f	67	32.5
Microhyla fissipes embryonic survival
Habitat	Parent	Number surviving	Number unhatched/dead	Proportion surviving
a	1	147	3	0.98
a	1	167	3	0.982353
a	1	204	10	0.953271
a	2	212	1	0.995305
a	2	187	7	0.963918
a	2	199	6	0.970732
a	3	239	4	0.983539
a	3	214	1	0.995349
a	3	199	9	0.956731
a	4	173	2	0.988571
a	4	156	3	0.981132
a	4	203	5	0.975962
a	5	164	19	0.896175
a	5	119	2	0.983471
a	5	90	14	0.865385
a	6	164	6	0.964706
a	6	207	9	0.958333
a	6	192	1	0.994819
d	1	76	2	0.974359
d	1	77	1	0.987179
d	1	106	1	0.990654
d	2	157	10	0.94012
d	2	76	8	0.904762
d	2	160	3	0.981595
d	3	117	6	0.95122
d	3	146	7	0.954248
d	3	134	5	0.964029
d	4	167	4	0.976608
d	4	168	5	0.971098
d	4	155	7	0.95679
d	5	91	2	0.978495
d	5	87	2	0.977528
d	5	96	6	0.941176
d	6	121	7	0.945312
d	6	172	5	0.971751
d	6	69	8	0.896104
i	1	0	1	0
i	1	0	1	0
i	1	0	1	0
i	2	0	1	0
i	2	0	1	0
i	2	0	1	0
i	3	0	1	0
i	3	0	1	0
i	3	0	1	0
i	4	0	1	0
i	4	0	1	0
i	4	0	1	0
i	5	0	1	0
i	5	0	1	0
i	5	0	1	0
i	6	0	1	0
i	6	0	1	0
i	6	0	1	0
Microhyla fissipes larval survival
Habitat	Number surviving	Proportion surviving
a	18	0.72
a	23	0.92
a	22	0.88
a	23	0.92
a	12	0.48
a	25	1
a	23	0.92
a	25	1
a	22	0.88
a	24	0.96
a	15	0.6
a	5	0.2
a	15	0.6
a	12	0.48
a	25	1
a	18	0.72
a	11	0.44
a	19	0.76
d	7	0.28
d	9	0.36
d	14	0.56
d	19	0.76
d	9	0.36
d	4	0.16
d	15	0.6
d	16	0.64
d	1	0.04
d	10	0.4
d	4	0.16
d	21	0.84
d	16	0.64
d	15	0.6
d	11	0.44
d	21	0.84
d	17	0.68
d	11	0.44
i	0	0
i	0	0
i	2	0.08
i	0	0
i	0	0
i	0	0
i	0	0
i	0	0
i	1	0.04
i	1	0.04
i	0	0
i	0	0
i	0	0
i	0	0
i	0	0
i	0	0
i	0	0
i	0	0
Polypedates melanostictus embryonic survival
Habitat	Treatment	Number fly larvae	Number surviving	Number unhatched/dead	Proportion surviving
a	f	0	9	20	0.033241
a	f	18	0	47	0
a	f	7	22	103	0.0812558
a	f	12	31	27	0.534483
a	f	14	1	56	0.00369344
a	f	5	0	42	0
a	f	8	0	8	0
a	f	33	0	13	0
a	f	0	0	0	0
a	n	0	276	40	0.873418
a	n	0	294	11	0.963934
a	n	0	211	31	0.779317
a	n	0	136	29	0.502308
a	n	0	257	24	0.914591
a	n	0	218	21	0.912134
a	n	0	268	31	0.989843
a	n	0	0	0	0
a	n	0	267	52	0.836991
d	f	0	283	14	0.952862
d	f	0	126	136	0.480916
d	f	17	0	36	0
d	f	9	0	5	0
d	f	33	0	18	0
d	f	0	138	127	0.461882
d	f	8	0	11	0
d	f	11	0	7	0
d	f	0	122	36	0.772152
d	n	0	479	27	0.94664
d	n	0	156	16	0.906977
d	n	0	296	15	0.951768
d	n	0	312	13	0.96
d	n	0	193	12	0.941463
d	n	0	281	7	0.975694
d	n	0	307	11	0.965409
d	n	0	423	8	0.981439
d	n	0	331	14	0.95942
i	f	24	0	38	0
i	f	39	1	6	0.00268889
i	f	5	271	7	0.728691
i	f	0	306	14	0.95625
i	f	0	304	129	0.702079
i	f	0	151	107	0.585271
i	f	0	286	21	0.931596
i	f	0	293	35	0.893293
i	f	16	3	15	0.00806668
i	n	0	395	31	0.92723
i	n	0	313	12	0.963077
i	n	0	376	23	0.942356
i	n	0	531	8	0.985158
i	n	0	403	19	0.954976
i	n	0	368	35	0.913151
i	n	0	364	9	0.975871
i	n	0	212	14	0.938053
i	n	0	417	30	0.932886
Microhyla fissipes larval growth
	Total length (mm) by container
Habitat	1a	2a	3a	4a	5a	6a	1b	2b	3b	4b	5b	6b	1c	2c	3c	4c	5c	6c
a	21.7	18.93	22.6	15.25	19.98	18.67	21.23	18.46	18.32	20.89	10.38	18.68	19.32	20	23.97	24.98	21.98	18.07
a	22.94	21.5	21.83	16.21	15.52	19.67	21.78	22.32	16.84	19.48	7.21	15.78	18.53	20.89	21.9	17.34	22.56	18.29
a	20.93	14.69	20.34	12.37	13.95	19.98	23.01	19.09	18.89	21.87	9.44	18.08	18.35	22.53	20.86	19.07	22.99	18.83
a	22.92	23.95	16.19	11.94	17.57	13.79	24.7	19.1	18.79	20.78	11.36	12.01	21.15	19.36	22.46	21.31	22.55	17.01
a	20.7	28.83	18.27	12.04	15.56	20	21.21	18.36	17.42	20.35	10.21	13.73	19.76	20.24	21.71	19.13	21.53	19.92
a	21.95	20.86	17.38	11.3	20.82	20.32	18.48	19.42	16.54	21.52		15.15	19.8	19.24	22.53	16.14	22.68	18.14
a	23.89	20.17	18.81	15.18	20.96	21.98	25.76	15.49	18.28	21.14		13.37	24.18	21	22.12	20.56	22.27	16.32
a	22.05	20.04	18.82	10.36	16.69	15.14	23.42	16.84	21.89	20.64		18.26	16.19	22.36	24.48	24.34	20.03	13.18
a	20.93	19.69	23.7	10.92	22.77	19.99	18.44	23.08	22	12.4		18.94	21.17	19.89	22.85	22.31	18.69	13.54
a	19.19	22.34	19.53	12.44	24.06	17.41	15.16	22.96	16.59	20.93		14.94	19.42	23.33	20.36	19.84	20.79	17.09
a	18.57	17.92	21.37	13.65	17.8	21.17	22.93	17.48	23.08	19.52		15.06	22.36	24.21	21.02	23.43	16.67	18.82
a	18.28	24.41	19.26	16.52	18.08	22.03	23.19	18.39	21.73	19.41		14.1			19.39	19.03	19.7	16.46
a	22.31	16.67	18.38	13.02		21.09	24.76	21.78	18.61	19.92		11.52			19.86	19.23	21.01	16.81
a	18.91	19.98	15.08	16.23		21.2	22.4	18.45	21.12	17.35		10.67			22.81	19.98	21.54	17.08
a	16.93	21.63	17.94	17.06		23.39	22.2	19.28	17.58	17.59		13.49			23.44	19.21	18.42	18.87
a	18.14	26.52	18.87	15.13		22.16	22.71		22.11	19.76		14.03				22.39	23.84	16.26
a	21.09	22.99	21.02	19.76		21.34	24.57		20.13	21.13		10.35				22.01	21.57	18.34
a	15.27	23.14	18.48			20.5	22.05		20.82	19.66		9.89				18.62	18.17	18.25
a	15.22	19.82	21.45			19.93	23.3		21.13	23.48		12.78					22.06	18.61
a	17.13	21.42	15			20.41	23.71		17.6	21.15		19.17						16.43
a	21.03	22.38	17.98			22.47	21.6		20.15	18.65		15.65						16.84
a	18.35	18.82	20.75				22.73		22.19	21.56		11.6						17.41
a	22.73	17.37	17.91				26.51		20.12	20.55								20.67
a			17.67				25.85		19.3									21.19
a			21.05						22.83									19.98
d	20.35	18.24	16.24	17.26	20.12	19.84	16.86	17.85	18.36	23.36	15.39	16.02	20.43	18.84	16.73	20.15	10.86	16.69
d	17.47	19.89	18.97	14.39	15.36	17.4	19.39	18.79	19.21		18.32	13.34	17.6	17.19	12.35	15.13	11.97	15.3
d	19.86	20.23	19.63	16.04	17.17	11.67	17.47	17.28	21.17		19.76	13.38	19.82	15.66	18.46	16.85	12.4	15.78
d	21.04	19.64	17.49	15.34	20.92	8.97	19.04	15.42	17.87		19.36	12.53	19.55	14.57	20.16	19.88	9.86	17.73
d	20.11	21.36	18.49		21.33	9.83	16.39		20.05		22.38	14.81	20.65	18.92	22.63	17.73	9.71	11.9
d	17.4	17.29	23.26		21.64	9.32	15.5		23.14		23.33	12.28	16.11	15.15	22.29	19.08	10.54	12.41
d	18.36	18.21	21.02		18.46		20.79		14.47		23.92	14.08	18.21	16.16	16.1	17.42	13.59	17.13
d	19.42	17.39	20.15		14.52		18.36		20.57		22.11	16.96	15.5	15.41	19.77	11.6	8.91	13.68
d	20.43	24.07	21.68		18.4		19.81		19.94		19.5	12.59	12.11	16.84	20.09	17.19	16.53	12.3
d		16.32			18.48		19.79		24.18		19.36	10.95	12.09	15.74	18.03	5.62	15.16	17.69
d		20.16			19.63		21.03		22.78			16.63	14.13	14.17	19.32	14.96	8.23	13.89
d		23.2			19.84		20.78		22.47			11.3		17.52	16.1	16.37		14.3
d		21.51			21.32		21.97		21.37			13.08		16.02	18.29	15.64		12.25
d		22.41			17.11		22.04		19.65			14.14		14.09	21.29	15.69		16.32
d		21					20.92		20.59			12.62		16.98	25.18	22.91		13.76
d		21.27					19.22		22.4					18.72		22.11		14.98
d		18.8					16.03									12.86		18.24
d		22.79					17.43											16.91
d		22.67					17.79											16.43
d							19.43											18.7
d							17.79											13.51
i		8.62							6.45	8.81
i		7.33
